# Supplementary material for: Suppressing singlet–triplet annihilation processes to achieve highly efficient deep-blue AIE-based OLEDs
Source: Royal Society of Chemistry journal article supplement (doi:10.1039/d2mh00627h), 2022-01-01
Supplement: d2mh00627h1.pdf [file d2mh00627h1.pdf]

# Suppressing Singlet-triplet Annihilation Process to Achieve Highly Efficient Deep-Blue AIE-Based OLEDs

*Chengwei Lin,<sup>a</sup> Pengbo Han,<sup>a</sup> Fenlan Qu,<sup>a</sup> Shu Xiao,<sup>a</sup> Yuanzhao Li,<sup>a</sup> Dian Xie,<sup>a</sup>*

*Xianfeng Qiao,<sup>a</sup> Dezhi Yang,<sup>a</sup> Yanfeng Dai,<sup>a</sup> Qian Sun,<sup>a</sup> Anjun Qin,<sup>\*,a</sup> Ben Zhong*

*Tang<sup>\*,a,b</sup> and Dongge Ma<sup>\*,a</sup>*

<sup>a</sup>Center for Aggregation-Induced Emission, Institute of Polymer Optoelectronic Materials and Devices, Guangdong Provincial Key Laboratory of Luminescence from Molecular Aggregates, Guangdong-Hong Kong-Macao Joint Laboratory of Optoelectronic and Magnetic Functional Materials, State Key Laboratory of Luminescent Materials and Devices, South China University of Technology, Guangzhou 510640, China

E-mail: [msdgma@scut.edu.cn](mailto:msdgma@scut.edu.cn), [msqinaj@scut.edu.cn](mailto:msqinaj@scut.edu.cn)

<sup>b</sup>Shenzhen Institute of Molecular Aggregate Science and Engineering, School of Science and Engineering, The Chinese University of Hong Kong, Shenzhen, 2001 Longxiang Boulevard, Longgang District, Shenzhen City, Guangdong 518172, China.

E-mail: [tangbenz@cuhk.edu.cn](mailto:tangbenz@cuhk.edu.cn)

---

## Section S1. Photophysical Equations

The rate constants were determined using the following basic photophysical functions:

$$\phi_{PF} = \phi_{PL} R_{prompt} \quad (S1)$$

$$\phi_{DF} = \phi_{PL} R_{delayed} \quad (S2)$$

$$k_r^S = \phi_{PF} / \tau_{PF} \quad (S3)$$

$$\phi_{PL} = k_r^S / (k_r^S + k_{nr}^S) \quad (S4)$$

$$\phi_{PF} = k_r^S / (k_r^S + k_{nr}^S + k_{ISC}) \quad (S5)$$

$$\phi_{ISC} = k_{ISC} / (k_r^S + k_{nr}^S + k_{ISC}) \quad (S6)$$

$$k_{hRISC} = \frac{k_{PF} k_{DF} \phi_{DF}}{k_{ISC} \phi_{PF}} \quad (S7)$$

$$k_{IC}^T = k_{DF} - k_{hRISC} \phi_{DF} \quad (S8)$$

$$\phi_{hRISC} = k_{hRISC} / (k_{hRISC} + k_{IC}^T) \quad (S9)$$

$$k_{PF} = 1 / \tau_{PF} \quad (S10)$$

$$k_{DF} = 1 / \tau_{DF} \quad (S11)$$

here  $\phi_{PL}$  is the photoluminescence quantum yield (PLQY).  $\phi_{PF}$  and  $\phi_{DF}$  are the prompt and delayed fluorescence efficiencies, respectively.  $\phi_{ISC}$  and  $\phi_{hRISC}$  are the ISC and hRISC efficiencies, respectively.  $\tau_{PF}$  and  $\tau_{DF}$  are the prompt and delayed fluorescent lifetimes, respectively.  $k_r^S$ ,  $k_{nr}^S$ ,  $k_{ISC}$ ,  $k_{hRISC}$ ,  $k_{IC}^T$ ,  $k_{PF}$  and  $k_{DF}$  are the rates of singlet radiation, singlet non-radiation, ISC, hRISC, IC from  $T_n$  state to  $T_1$  state, prompt fluorescence and decay fluorescence processes, respectively.  $R_{prompt}$  and  $R_{delayed}$  are the component ratios of prompt and delayed fluorescence, respectively.

## Section S2. Steady-state dynamics

Taking account of all the possible hRISC, TTA and STA processes, the time evolution of singlet and triplet excited state decay of AIE by electrical pulse excitation can be modeled as

$$\frac{dS_1}{dt} = \gamma(J) \frac{J}{4ed} - (k_r^S + k_{nr}^S + k_{ISC}) S_1 + k_{hRISC} T_n - k_{STA} S_1 T_1 + \frac{\alpha}{2} k_{TTA} T_1^2 \quad (S12)$$

$$\frac{dT_n}{dt} = \gamma(J) \frac{3J}{4ed} - k_{IC}^T T_n - k_{hRISC} T_n + k_{ISC} S_1 \quad (S13)$$

$$\frac{dT_1}{dt} = k_{IC}^T T_n - k_T T_1 - \frac{1 + \alpha}{2} k_{TTA} T_1^2 \quad (S14)$$

To exclude the influence of singlet-triplet annihilation, we only explore the dynamic process at low current density. Therefore,  $k_{STA} S_1 T_1 \approx 0$ . Because  $k_r^S + k_{nr}^S \gg k_{ISC}$ ,  $k_{ISC} S_1$  can be negligible. The evaluation of  $T_n$  can be solved using Equation S13 and is expressed as

$$T_n = \frac{3\gamma(J)J}{4ed(k_{IC}^T + k_{hRISC})} \quad (S15)$$

under low current density region, where the triplet monomolecular decay dominates and the bimolecular can be negligible ( $k_{nr}^T T_1 \gg \frac{1 + \alpha}{2} k_{TTA} T_1^2$ ), the evaluation of  $T_1$  can be solved using Equation S14 and S15 and is expressed as

$$T_1 = \frac{3\gamma(J)k_{IC}^T J}{4ed(k_{IC}^T + k_{hRISC})k_T} \quad (S16)$$

the evaluation can be solved using Equation S12, S15 and S16 and is expressed as

$$S_1 = \frac{1}{(k_r^S + k_{nr}^S)} \left[ \frac{3\gamma(J)}{4ed} \left( \frac{k_{hRISC}}{k_{hRISC} + k_{IC}^T} \right) + \frac{\gamma(J)}{4ed} \right] J + \frac{k_{TTA}\alpha}{2k_T^2(k_r^S + k_{nr}^S)} \left[ \frac{3\gamma(J)}{4ed} \frac{k_{IC}^T}{k_{hRISC} + k_{IC}^T} \right]^2 J^2 \quad (S17)$$

Because  $\frac{k_{hRISC}}{k_{hRISC} + k_{IC}^T} = \phi_{hRISC}$  and  $\gamma(J) = 1$ , Equation S17 is abbreviated

$$S_1 = \frac{1}{(k_r^S + k_{nr}^S)} \left[ \frac{3}{4ed} \phi_{hRISC} + \frac{1}{4ed} \right] J + \frac{k_{TTA}\alpha}{2k_T^2(k_r^S + k_{nr}^S)} \left[ \frac{3}{4ed} (1 - \phi_{hRISC}) \right]^2 J^2 \quad (S18)$$

As discussed above, the overall singlets contain two components. The first part is the singlets from the direct charge recombination and hRISC process, which are linearly dependent on current density as expected for the whole investigated current range. The second part is the singlets indirectly produced via TTA, which are proportional to the square of current density. Since the EL intensity is proportional to the singlet density, the ratio of the EL intensity from the two parts, donated as  $R = EL_T/EL_S$ , can be, respectively, described by

$$R = \frac{9 \cdot k_{TTA} \cdot \gamma(J) \cdot \alpha \cdot (1 - \phi_{hRISC})^2}{8k_T^2 ed \cdot (3 \cdot \phi_{hRISC} + 1)} \cdot J \quad (\text{S19})$$

Because  $\alpha = 0.25$ . Equation S18 is expressed as

$$R = \frac{9 \cdot k_{TTA} \cdot \gamma(J) \cdot (1 - \phi_{hRISC})^2}{32k_T^2 ed \cdot (3 \cdot \phi_{hRISC} + 1)} \cdot J \quad (\text{S20})$$

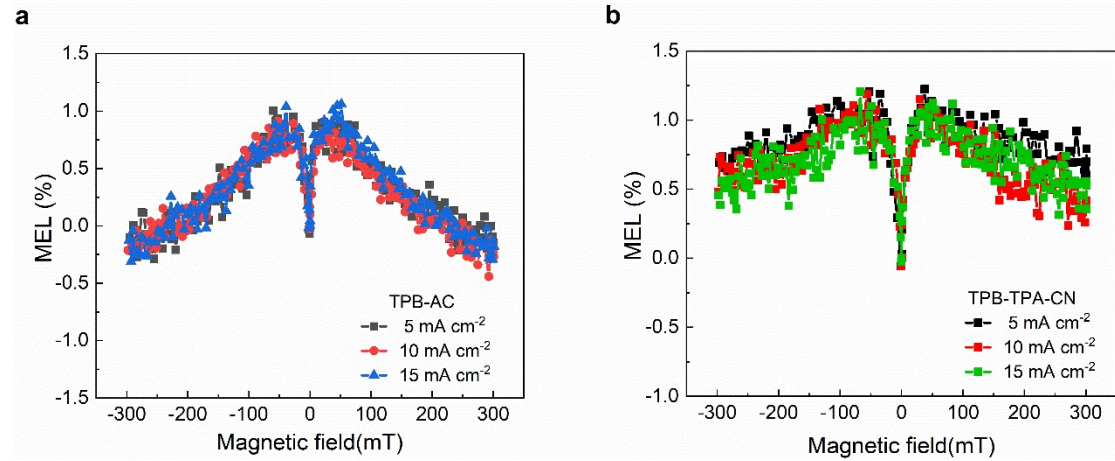

**Figure S1.** MEL responses of the (a) non-doped TPB-AC, and (b) non-doped TPB-TPA-CN devices at different current densities.

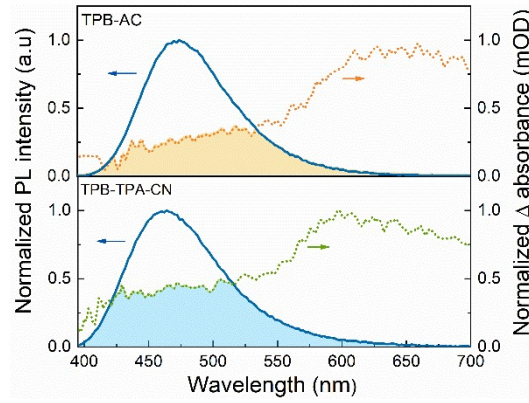

**Figure S2.** PL spectra of TPB-AC and TPB-TPA-CN in chlorobenzene solution, and triplet absorption spectra of TPB-AC and TPB-TPA-CN in chlorobenzene solution.

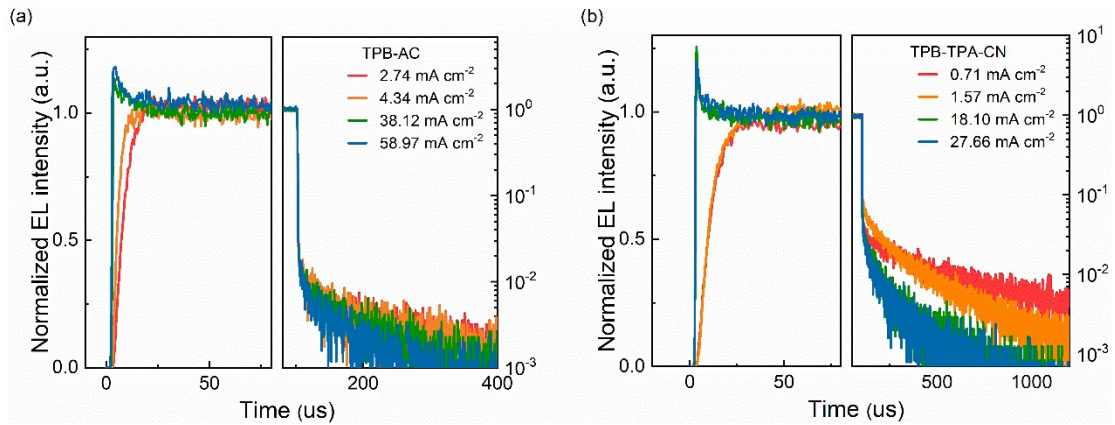

**Figure S3.** (a) Transient-EL decay curves of the non-doped TPB-AC OLEDs at different current densities. (c) Transient-EL decay curves of the non-doped TPB-TPA-CN OLEDs at different current densities.

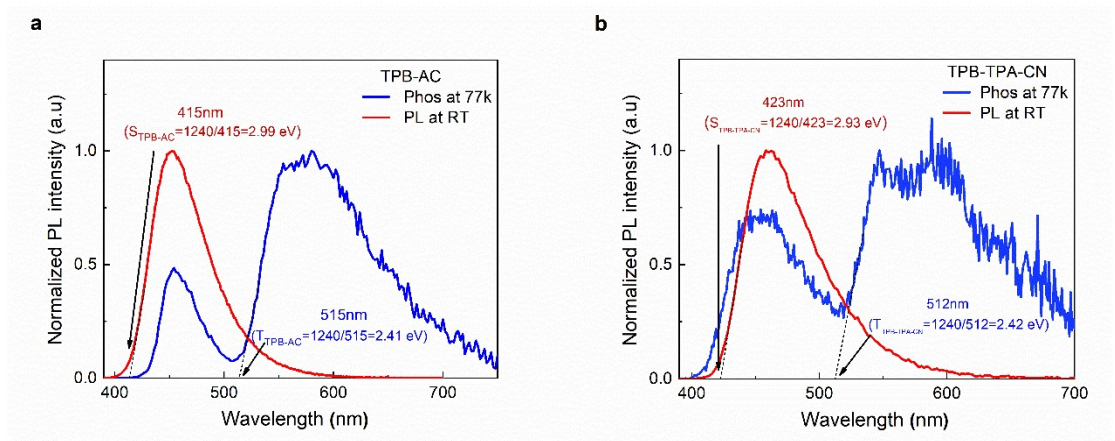

**Figure S4.** Normalized PL spectra of (a) TPB-AC and (b) TPB-TPA-CN films at room temperature (RT) and 77 K.

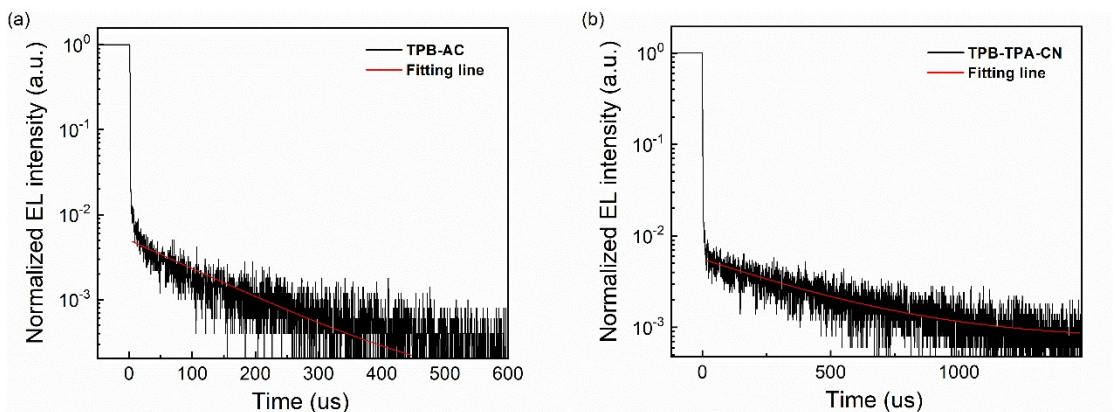

**Figure S5.** TREL characteristics of AIE-OLEDs with emitter of a) TPB-AC, b) TPB-TPA-CN. The red lines are fitting line for obtaining the lifetime values of up-conversion fluorescence.

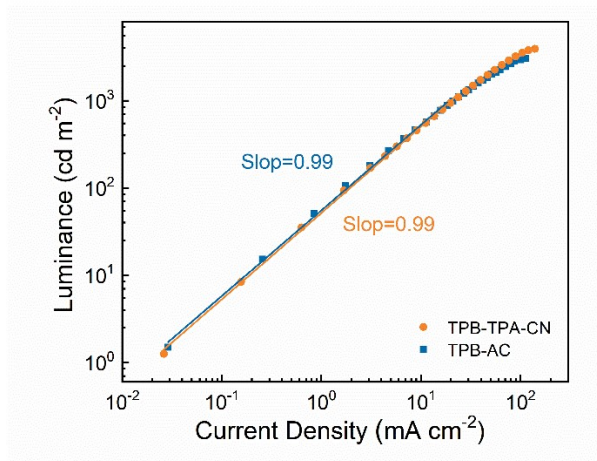

**Figure S6.** Current-density-luminance curves of the non-doped TPB-AC and TPB-TPA-CN OLEDs.

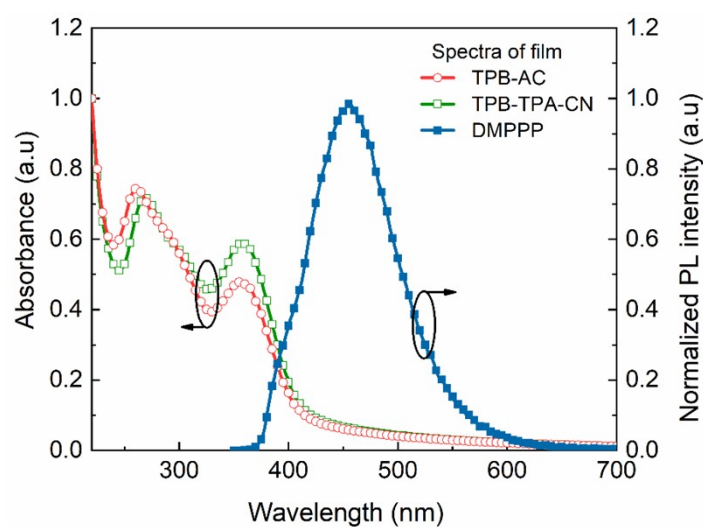

**Figure S7.** UV spectra of TPB-AC and TPB-TPA-CN neat films, and PL spectra of DMPPP neat film.

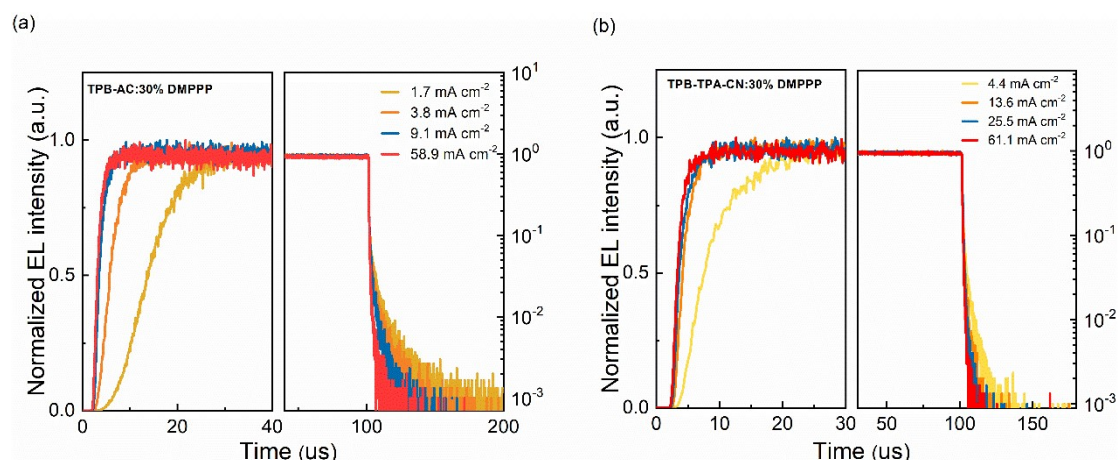

**Figure S8.** (a) Transient-EL decay curves of the TPB-AC:30% DMPPP OLEDs at different current densities. (b) Transient-EL decay curves of the TPB-TPA-CN:30%

DMPPP OLEDs at different current densities.

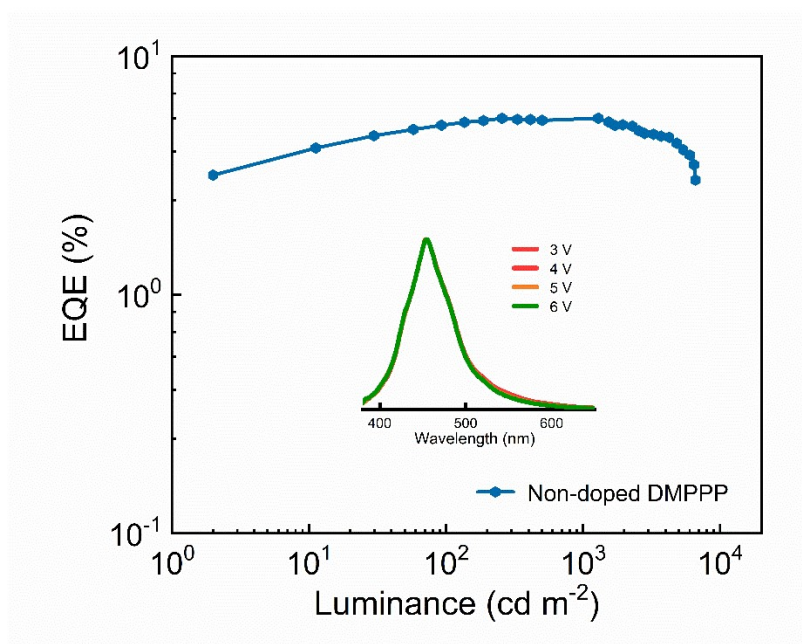

**Figure S9.** EQE versus luminance characteristic of the resulting non-doped DMPPP OLEDs. The inset shows the electroluminescent (EL) spectra at different voltages.

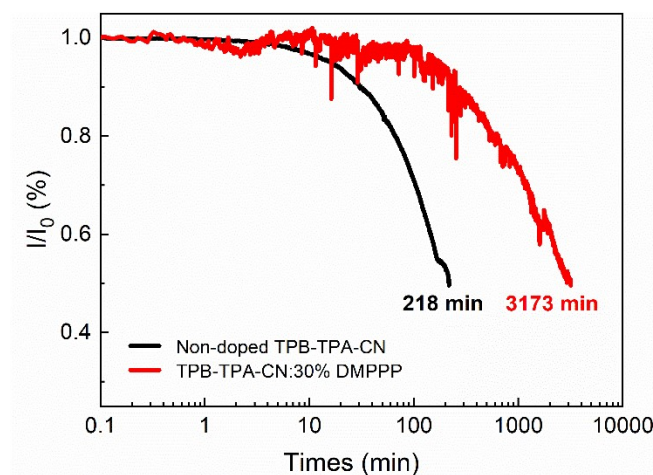

**Figure S10.** Lifetimes of the non-doped TPB-TPA-CN and TPB-TPA-CN: 30% DMPPP OLEDs at  $500 \text{ cd m}^{-2}$ . The device structures are as follows: ITO/HAT-CN (10 nm)/NPB (60 nm)/TCTA (5 nm)/ emitting layer (11 nm)/TPBi (30nm)/LiF (1nm)/Al (100nm). NPB is *N,N'*-diphenyl-*N,N'*-bis(1-naphthyl)-1,1'-biphenyl-4,4'-diamine. TPBi is 1,3,5-tris(*N*-phenylbenzimidazol-2-yl)benzene.

**Table S1.** Electroluminescent data of the optimized devices based on the two AIE materials

| EML                   | $L_{\max}$<br>[cd m <sup>-2</sup> ] | $CE_{\max}$<br>[cd A <sup>-1</sup> ] <sub>1</sub> | $EQE_{\max}$<br>[%] | $PE_{\max}$<br>[lm W <sup>-1</sup> ] <sub>1</sub> | Roll-off at 1000 cd m <sup>-2</sup><br>[%] | EL peak<br>[nm] | CIE<br>(x,y) |
|-----------------------|-------------------------------------|---------------------------------------------------|---------------------|---------------------------------------------------|--------------------------------------------|-----------------|--------------|
| Non-doped TPB-AC      | 3911                                | 5.9                                               | 8.7                 | 5.5                                               | 16.1                                       | 453             | (0.14,0.07)  |
| Non-doped TPB-TPA-CN  | 3043                                | 6.3                                               | 7.7                 | 6.5                                               | 18.2                                       | 453             | (0.15,0.07)  |
| TPB-AC: 30% DMPPP     | 12340                               | 7.4                                               | 11.1                | 6.3                                               | 0.0                                        | 453             | (0.15,0.07)  |
| TPB-TPA-CN: 30% DMPPP | 7579                                | 8.6                                               | 11.8                | 8.2                                               | 0.0                                        | 452             | (0.15,0.07)  |

$L_{\max}$ : the maximum luminance;  $CE_{\max}$ : the maximum current efficiency;  $EQE_{\max}$ : the maximum external quantum efficiency;  $PE_{\max}$ : the maximum power efficiency; EL peak: the peak of the EL spectrum; CIE(x,y): the CIE coordinates at 5 V.

**Table S2.** Photophysical properties of the BD-doped TPB-PAPC films.

| Compound   | $\phi_{\text{PL}}^{[a]}$<br>[%] | $\tau_{\text{PF}}^{[b]}$<br>[ns] | $\tau_{\text{DF}}^{[c]}$<br>[ns] | $k_{\text{PF}}^{[d]}$<br>[10 <sup>8</sup> s <sup>-1</sup> ] | $k_{\text{DF}}^{[e]}$<br>[10 <sup>8</sup> s <sup>-1</sup> ] | $k_{\text{ISC}}^{[f]}$<br>[10 <sup>8</sup> s <sup>-1</sup> ] | $k_{\text{hRISC}}^{[g]}$<br>[10 <sup>8</sup> s <sup>-1</sup> ] | $k_r^{S[h]}$<br>[10 <sup>8</sup> s <sup>-1</sup> ] | $k_{\text{nr}}^{S[i]}$<br>[10 <sup>7</sup> s <sup>-1</sup> ] | $k_{\text{IC}}^{Tn[j]}$<br>[10 <sup>8</sup> s <sup>-1</sup> ] | $\phi_{\text{ISC}}^{[k]}$<br>[%] | $\phi_{\text{hRISC}}^{[l]}$<br>[%] | $\phi_{\text{hRISC}}/\phi_{\text{ISC}}^{[n]}$<br>[%] | $k_T^{[m]}$<br>[10 <sup>3</sup> s <sup>-1</sup> ] | $k_{\text{TTA}}^{[m]}$<br>[10 <sup>-16</sup> cm <sup>3</sup> s <sup>-1</sup> ] | $k_{\text{STA}}^{[o]}$<br>[10 <sup>-10</sup> cm <sup>3</sup> s <sup>-1</sup> ] |
|------------|---------------------------------|----------------------------------|----------------------------------|-------------------------------------------------------------|-------------------------------------------------------------|--------------------------------------------------------------|----------------------------------------------------------------|----------------------------------------------------|--------------------------------------------------------------|---------------------------------------------------------------|----------------------------------|------------------------------------|------------------------------------------------------|---------------------------------------------------|--------------------------------------------------------------------------------|--------------------------------------------------------------------------------|
| TPB-AC     | 98                              | 2.3                              | 5.3                              | 4.4                                                         | 1.9                                                         | 0.8                                                          | 2.3                                                            | 3.5                                                | 0.7                                                          | 1.5                                                           | 18                               | 61                                 | 3.4                                                  | 4.0                                               | 8.7                                                                            | 3.9                                                                            |
| TPB-TPA-CN | 93                              | 2.1                              | 8.9                              | 4.8                                                         | 1.1                                                         | 0.9                                                          | 1.4                                                            | 3.5                                                | 2.7                                                          | 0.9                                                           | 20                               | 62                                 | 3.1                                                  | 1.4                                               | 7.5                                                                            | 7.5                                                                            |

[a] PL quantum yield; [b] the prompt fluorescent lifetime; [c] the delayed fluorescent lifetime; [d] Rate constants of prompt fluorescence, [e] decay fluorescence, [f] ISC, [g] hRISC; [h] singlet radiation; [i] singlet non-radiation, and [j] IC of highly-lying excitation triplet; [k] ISC efficiency; [l] hRISC efficiency; [n] triplet monomolecular recombination; [m] TTA up-conversion; [o] STA process.
